# Supplementary material for: New N4-Donor Ligands as Supramolecular Guests for DNA and RNA: Synthesis, Structural Characterization, In Silico, Spectrophotometric and Antimicrobial Studies
Source: MDPI journal article supplement (doi:10.3390/molecules28010400), 2023-01-03
Supplement: s1 [file s1]

## Supplementary materials

|                                                                                                                                                                                                                |    |
|----------------------------------------------------------------------------------------------------------------------------------------------------------------------------------------------------------------|----|
| Table S 1 Relevant geometrical parameters (Å, °) with su's in parentheses. i denotes the symmetry operation 1-x,1-y,1-z. X and Y are mean planes of the phenyl and thiazole rings in the ligand molecules..... | 2  |
| Figure S 1 <sup>1</sup> H NMR spectrum of ligand <b>L1</b> in ACN-d3. ....                                                                                                                                     | 3  |
| Figure S 2 <sup>13</sup> C NMR spectrum of ligand <b>L1</b> in DMSO-d6. ....                                                                                                                                   | 3  |
| Figure S 3 <sup>1</sup> H NMR spectrum of ligand <b>L2</b> in DMSO-d6. ....                                                                                                                                    | 4  |
| Figure S 4 <sup>13</sup> C NMR spectrum of ligand <b>L2</b> in DMSO-d6. ....                                                                                                                                   | 4  |
| Figure S 5 <sup>1</sup> H NMR spectrum of ligand <b>L3</b> in DMSO-d6. ....                                                                                                                                    | 5  |
| Figure S 6 <sup>13</sup> C NMR spectrum of ligand <b>L3</b> in DMSO-d6. ....                                                                                                                                   | 5  |
| Figure S 7 <sup>1</sup> H NMR spectrum of ligand <b>L4</b> in ACN-d3. ....                                                                                                                                     | 6  |
| Figure S 8 <sup>13</sup> C NMR spectrum of ligand <b>L4</b> in ACN-d3.....                                                                                                                                     | 6  |
| Figure S 9 <sup>1</sup> H NMR spectrum of ligand <b>L5</b> in DMSO-d6. ....                                                                                                                                    | 7  |
| Figure S 10 <sup>13</sup> C NMR spectrum of ligand <b>L5</b> in DMSO.....                                                                                                                                      | 7  |
| Figure S 11 Superimposed <sup>1</sup> H NMR spectra of <b>L1</b> and coordination polymer {[Cu <b>L1</b> ]PF <sub>6</sub> ] <sub>n</sub> in ACN-d3...                                                          | 8  |
| Figure S 12 Superimposed <sup>1</sup> H NMR spectra of <b>L1</b> and coordination polymer {[Ag <b>L1</b> ]BF <sub>4</sub> ] <sub>n</sub> in ACN-d3...                                                          | 8  |
| Figure S 13 Spectrophotometric titration of <b>L2</b> ligand with CT-DNA. ....                                                                                                                                 | 9  |
| Figure S 14 Spectrophotometric titration of <b>L3</b> ligand with CT-DNA. ....                                                                                                                                 | 9  |
| Figure S 15 Spectrophotometric titration of <b>L4</b> ligand with CT-DNA. ....                                                                                                                                 | 9  |
| Figure S 16 Spectrophotometric titration of <b>L5</b> ligand with CT-DNA. ....                                                                                                                                 | 10 |
| Figure S 17 Spectrophotometric titration of <b>L2</b> ligand with RNA.....                                                                                                                                     | 10 |
| Figure S 18 Spectrophotometric titration of <b>L3</b> ligand with RNA.....                                                                                                                                     | 10 |
| Figure S 19 Spectrophotometric titration of <b>L4</b> ligand with RNA.....                                                                                                                                     | 11 |
| Figure S 20 Spectrophotometric titration of <b>L5</b> ligand with RNA.....                                                                                                                                     | 11 |

Table S 1 Relevant geometrical parameters ( $\text{\AA}$ ,  $^\circ$ ) with *su*'s in parentheses. <sup>i</sup> denotes the symmetry operation 1-x,1-y,1-z. X and Y are mean planes of the phenyl and thiazole rings in the ligand molecules.

| Polymer1         |                          | Polymer2         |                          |
|------------------|--------------------------|------------------|--------------------------|
| Cu1-N11A         | 1.997(2)                 | Ag1-N5A          | 2.305(4)                 |
| Cu1-N5B          | 2.060(2)                 | Ag1-N11A         | 2.514(3)                 |
| Cu1-N11B         | 2.116(2)                 | Ag1-N5B          | 2.335(4)                 |
| Cu1-N1C          | 1.969(2)                 | Ag1-N11B         | 2.428(3)                 |
| N11A-Cu1-N5B     | 120.58(8)                | N5A-Ag1-N11A     | 70.90(11)                |
| N11A-Cu1-N11B    | 123.67(8)                | N5A-Ag1-N5B      | 133.55(12)               |
| N11A-Cu1-N1C     | 106.45(9)                | N5A-Ag1-N11B     | 119.34(10)               |
| N5B-Cu1-N11B     | 80.47(8)                 | N11A-Ag1-N5B     | 117.70(12)               |
| N5B-Cu1-N1C      | 115.62(9)                | N11A-Ag1-N11B    | 156.12(11)               |
| N11B-Cu1-N1C     | 108.45(9)                | N5B-Ag1-N11B     | 72.45(11)                |
| N5A-C6A-C7A-S8A  | 2.9(3)                   | N5A-C6A-C7A-S8A  | -179.9(3)                |
| N5A-C6A-C7A-C11A | -176.0(2)                | N5A-C6A-C7A-C11A | -0.5(6)                  |
| N5B-C6B-C7B-S8B  | -170.24(19)              | N5B-C6B-C7B-S8B  | -179.3(3)                |
| N5B-C6B-C7B-N11B | 9.1(4)                   | N5B-C6B-C7B-N11B | -2.1(6)                  |
|                  |                          |                  |                          |
| X/Y              | A: 85.3(2)<br>B: 75.4(2) | X/Y              | A: 73.1(3)<br>B: 83.9(3) |
|                  |                          |                  |                          |

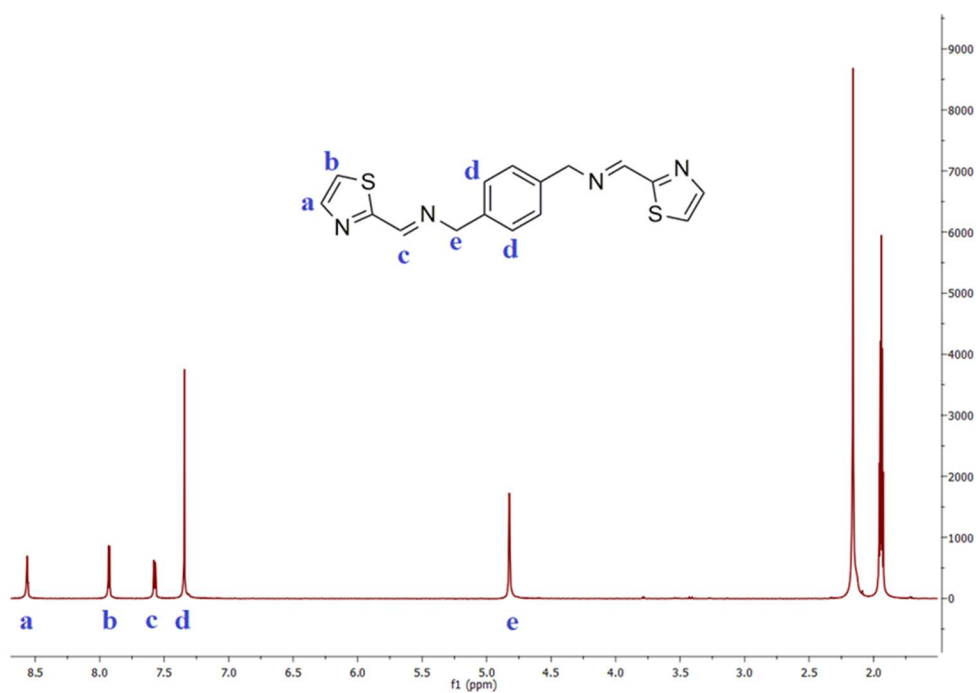

Figure S 1 <sup>1</sup>H NMR spectrum of ligand **L1** in ACN-d<sub>3</sub>.

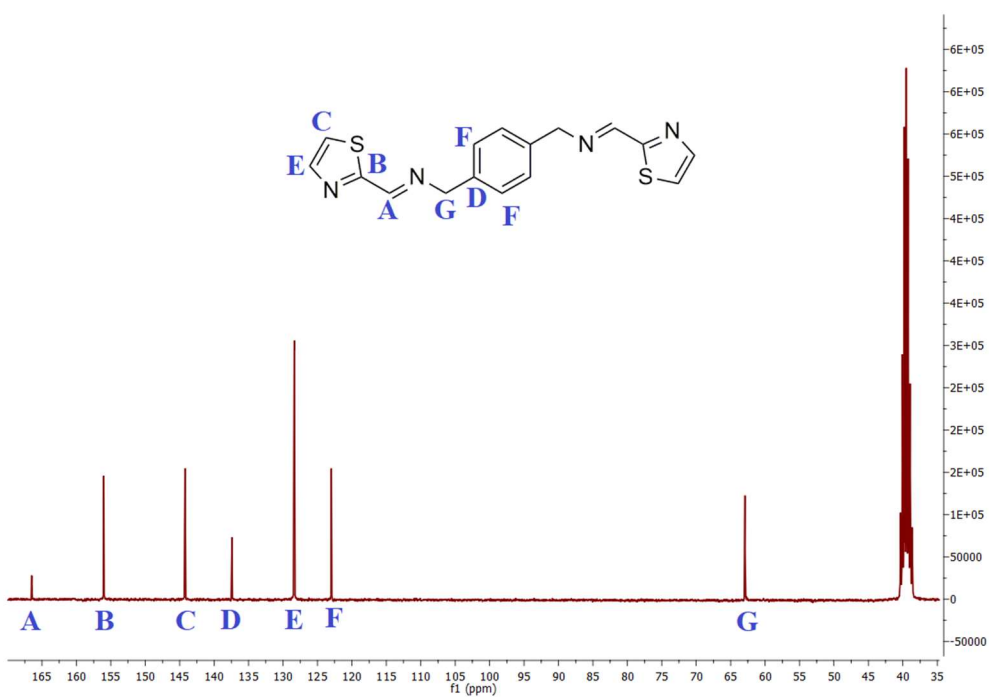

Figure S 2 <sup>13</sup>C NMR spectrum of ligand **L1** in DMSO-d<sub>6</sub>.

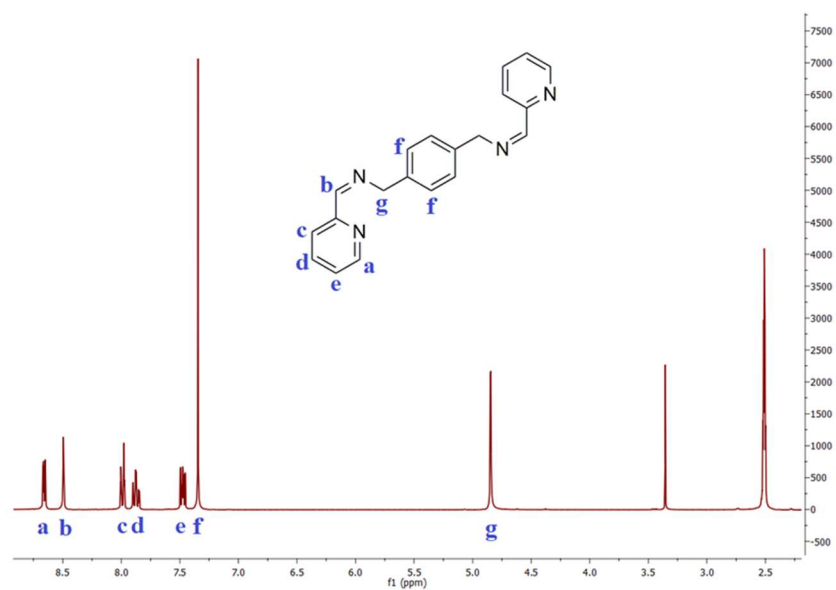

Figure S 3  $^1\text{H}$  NMR spectrum of ligand **L2** in  $\text{DMSO-d}_6$ .

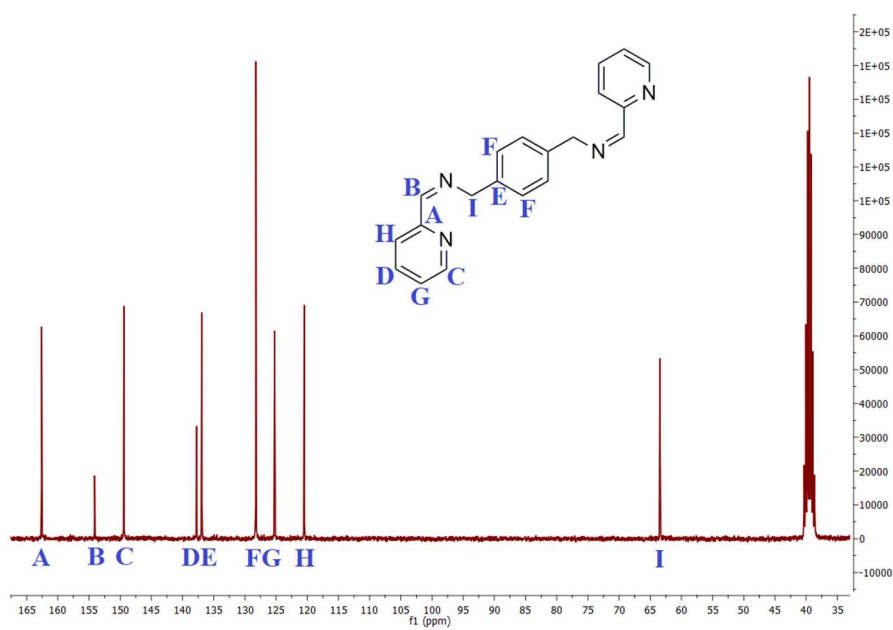

Figure S 4  $^{13}\text{C}$  NMR spectrum of ligand **L2** in  $\text{DMSO-d}_6$ .

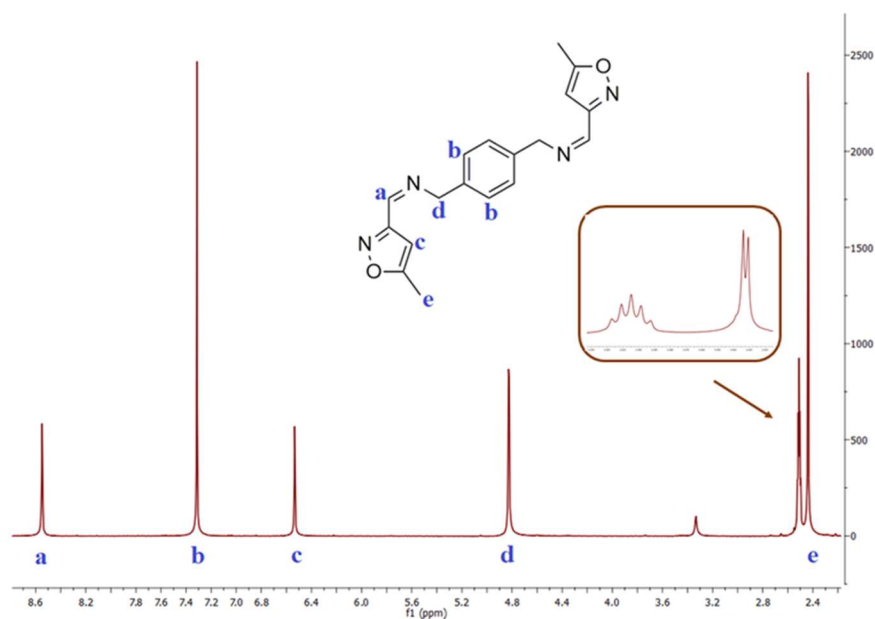

Figure S 5  $^1\text{H}$  NMR spectrum of ligand **L3** in  $\text{DMSO-d}_6$ .

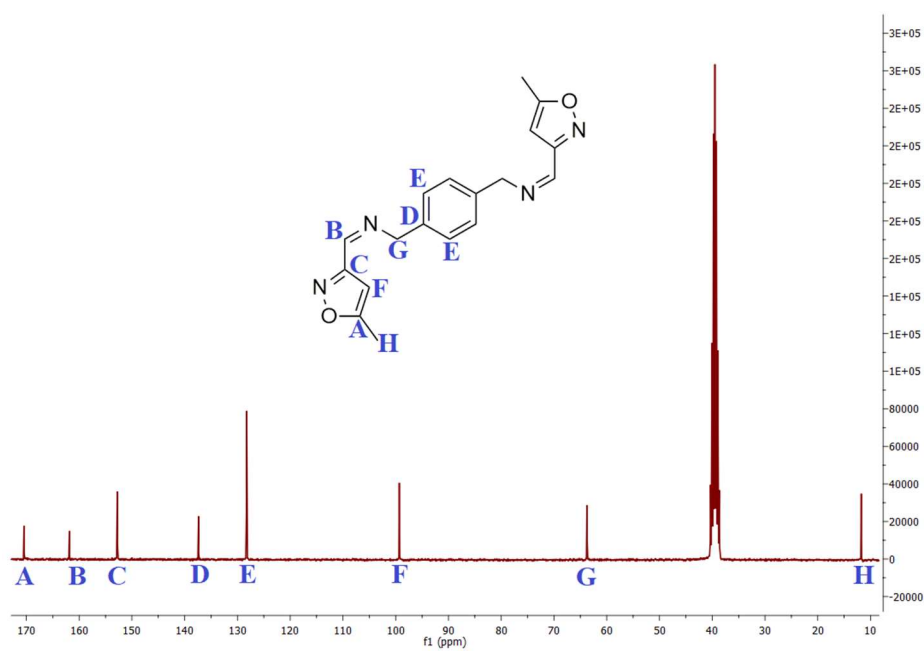

Figure S 6  $^{13}\text{C}$  NMR spectrum of ligand **L3** in  $\text{DMSO-d}_6$ .

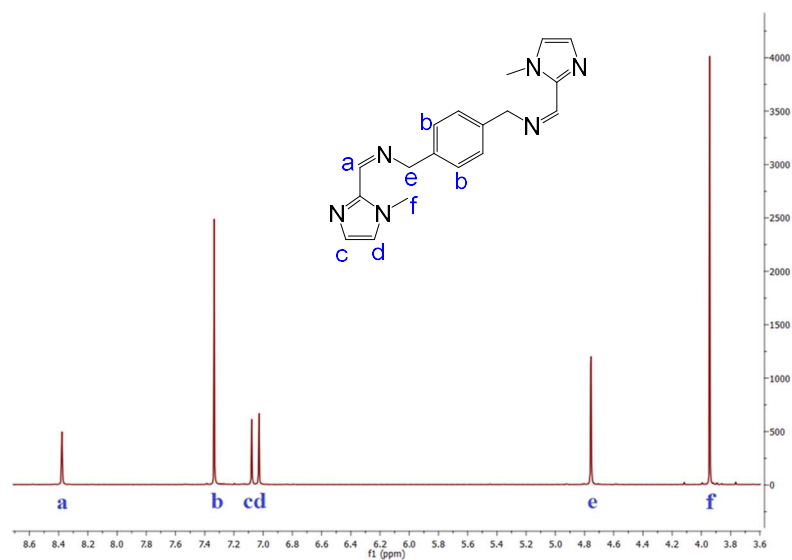

Figure S 7  $^1\text{H}$  NMR spectrum of ligand **L4** in  $\text{ACN-d}_3$ .

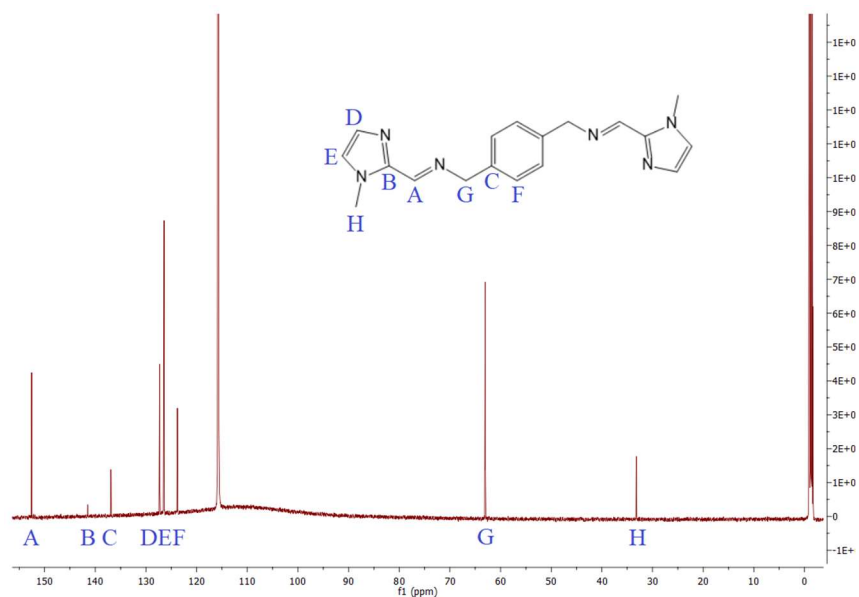

Figure S 8  $^{13}\text{C}$  NMR spectrum of ligand **L4** in  $\text{ACN-d}_3$ .

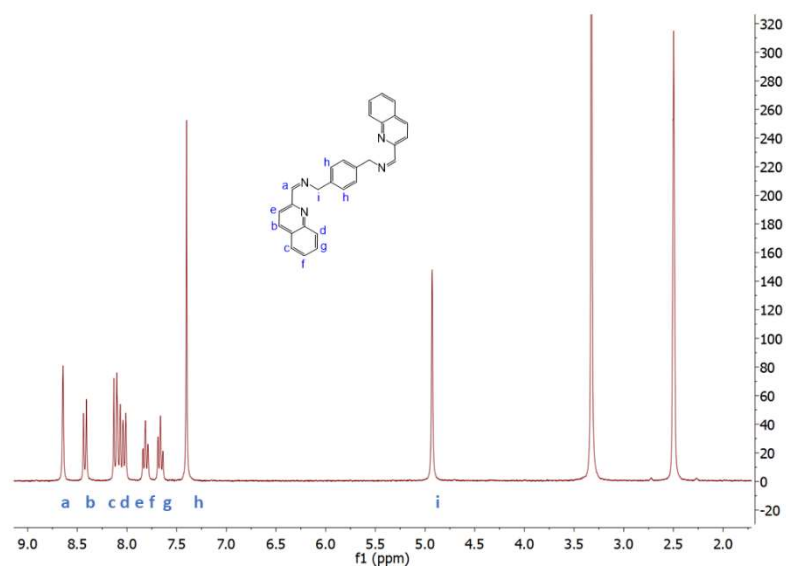

Figure S 9  $^1\text{H}$  NMR spectrum of ligand **L5** in  $\text{DMSO-d}_6$ .

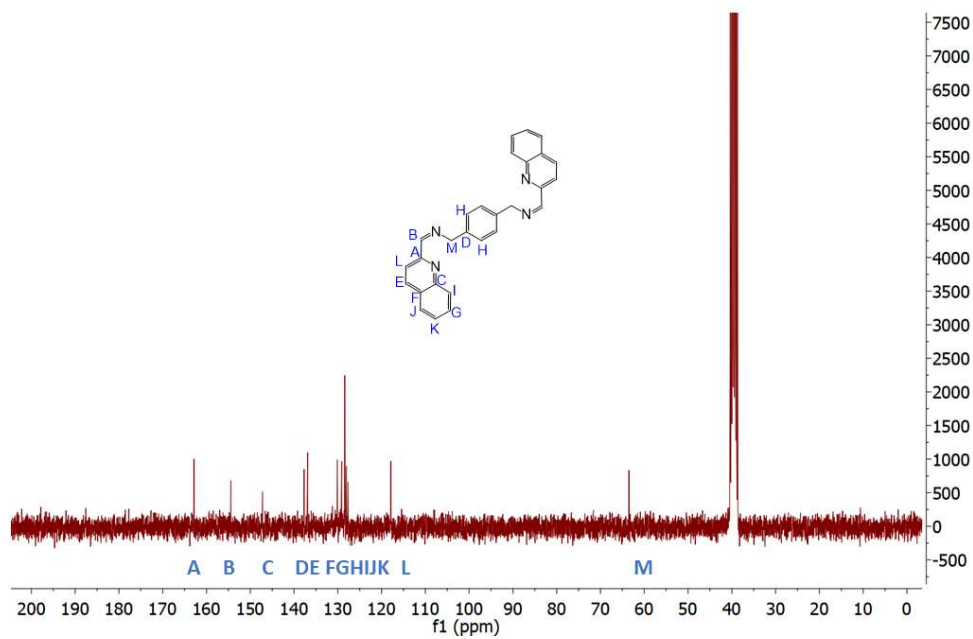

Figure S 10  $^{13}\text{C}$  NMR spectrum of ligand **L5** in  $\text{DMSO-d}_6$ .

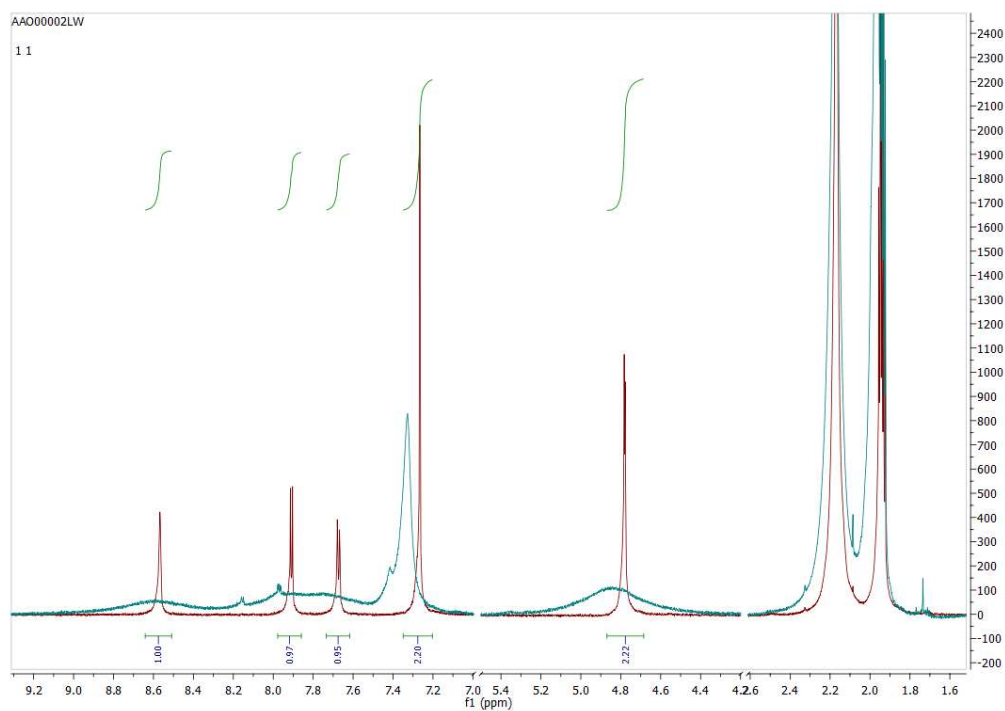

Figure S 11 Superimposed  $^1\text{H}$  NMR spectra of **L1** and coordination polymer  $\{[\text{CuL1}]\text{PF}_6\}_n$  in  $\text{ACN-d}_3$ .

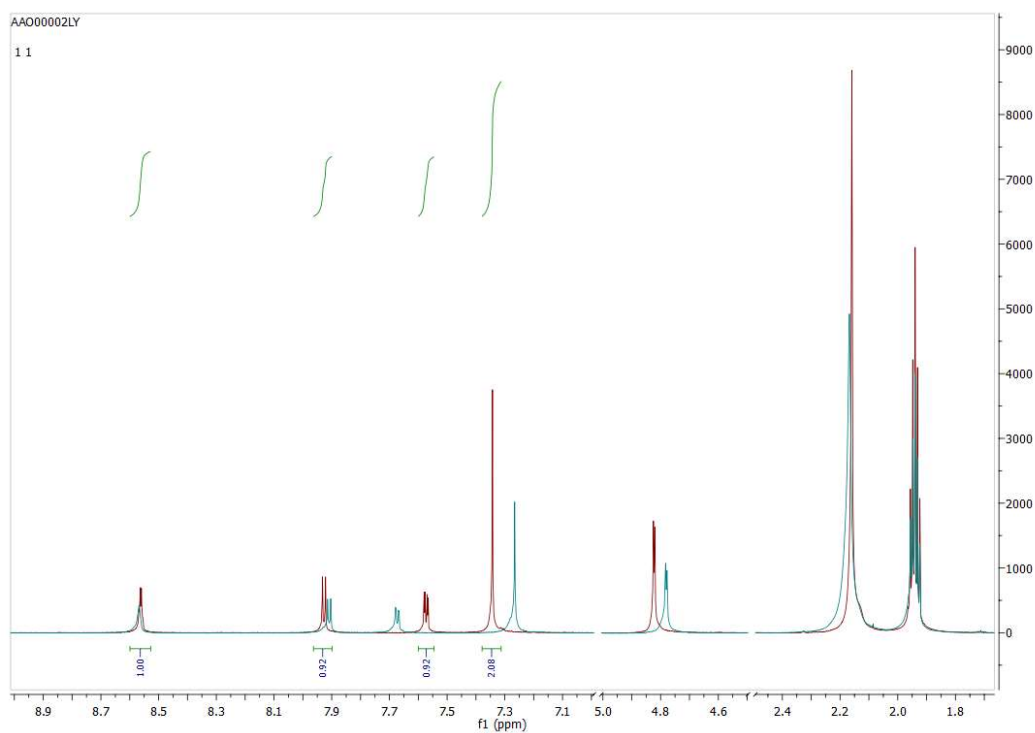

Figure S 12 Superimposed  $^1\text{H}$  NMR spectra of **L1** and coordination polymer  $\{[\text{AgL1}]\text{BF}_4\}_n$  in  $\text{ACN-d}_3$ .



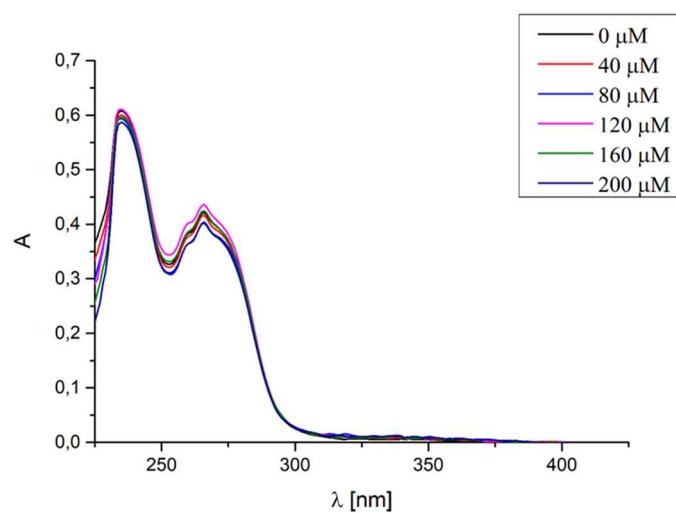

Figure S 13 Spectrophotometric titration of **L2** ligand with CT-DNA.

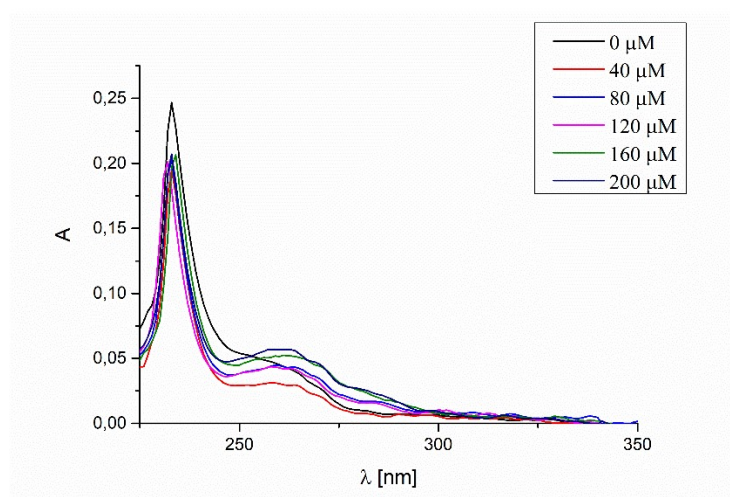

Figure S 14 Spectrophotometric titration of **L3** ligand with CT-DNA.

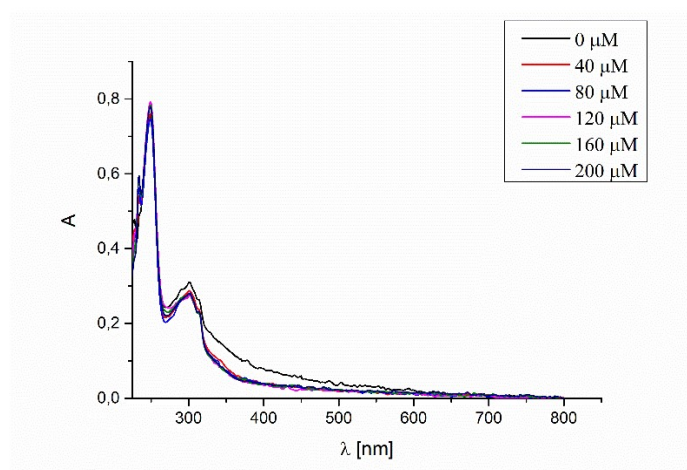

Figure S 15 Spectrophotometric titration of **L4** ligand with CT-DNA.

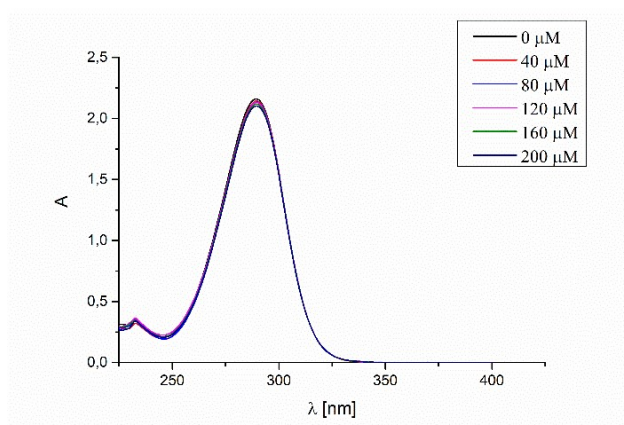

Figure S 16 Spectrophotometric titration of **L5** ligand with CT-DNA.

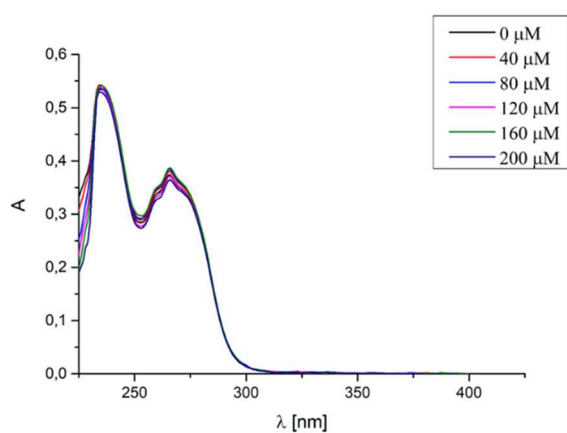

Figure S 17 Spectrophotometric titration of **L2** ligand with RNA.

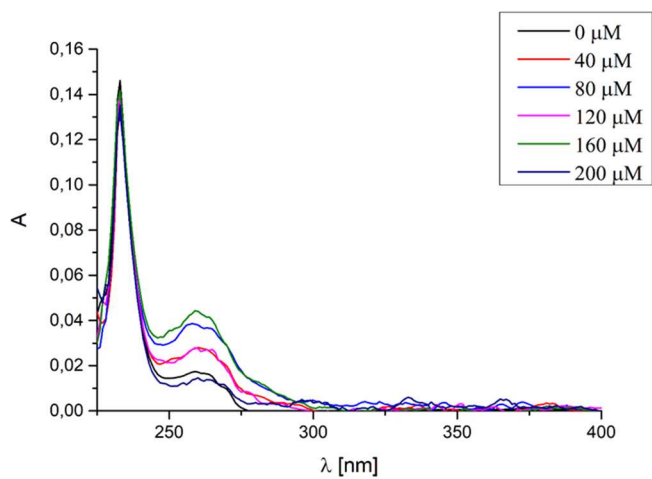

Figure S 18 Spectrophotometric titration of **L3** ligand with RNA.

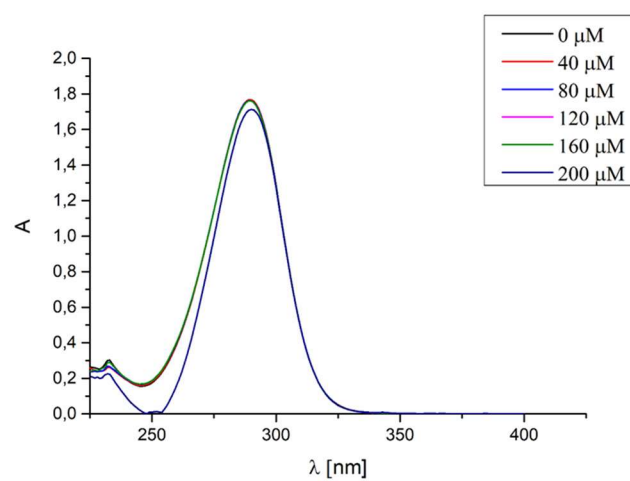

Figure S 19 Spectrophotometric titration of **L4** ligand with RNA.

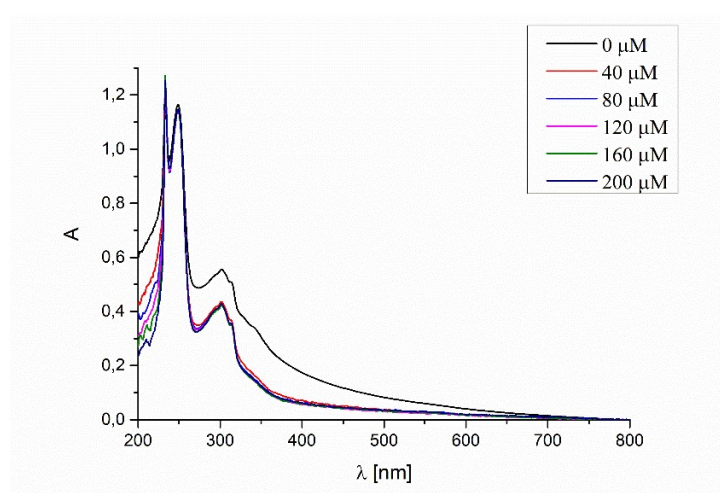

Figure S 20 Spectrophotometric titration of **L5** ligand with RNA.
